# Supplementary material
Source: PubMed Central journal article supplement (PMC10613016)
Supplement: glad045_suppl_supplementary_material.pdf [file glad045_suppl_supplementary_material.pdf]

## Supplemental Results

### *Characteristics by GDF-8 and GDF-11*

In Health ABC, those with higher GDF-8 levels were more likely to be male, non-White and obese; and to have higher weight, greater total and appendicular lean mass, greater BMI, and taller height than those with lower GDF-8 levels (Supplemental Table 5). Those with higher GDF-8 levels were also stronger (greater grip and leg extension strength) than those with lower GDF-8 levels. The time to complete the 400 m walk varied by quartile of GDF-8 levels with the fastest times in the middle quartiles. Diastolic (but not systolic) blood pressure was also higher in the higher quartiles of GDF-8. Similar findings were noted in CHS, in which those in the highest quartile of GDF-8 also weighed more, had taller height, were stronger, and had higher diastolic blood pressure than those in the lower quartiles of GDF-8 (Supplemental Table 6). GDF-11 levels were higher in those in the higher GDF-8 quartiles.

### *Characteristics by FST and FSTL3*

In Health ABC, those with higher follistatin levels were somewhat older, and had lower levels of GDF-8 but higher levels of FSTL3 than those with lower follistatin levels (Supplemental Table 7). Those with lower follistatin levels were stronger (greater grip strength) and were more likely to report a past cancer diagnosis. In CHS, those with higher follistatin levels were less likely to be male and weigh less, were shorter, were less likely to report angina or coronary heart disease, had lower grip strength, higher FSTL3 levels and greater body fat than those with lower follistatin levels (Supplemental Table 8). Self-reported health varied by follistatin quartiles (but without an obvious pattern).

In Health ABC, those with higher FSTL3 levels were older and weighed more; had higher BMI, percent body fat, and were more likely to be white, report coronary heart disease and to have mobility limitation than those with lower FSTL3 levels (Supplemental Table 9). Those with higher FSTL3 levels also had higher follistatin levels. In Health ABC, those with lower FSTL3 levels had greater grip strength and faster walking speed than those with higher FSTL3 levels. In CHS, those with higher FSTL3 levels were older and weighed more; had higher BMI, systolic blood pressure, and percent body fat; higher prevalence of congestive heart

failure, coronary heart disease, cancer and angina; and, were less likely to report good/excellent self-rated health than those with lower FSTL3 levels (Supplemental Table 10).

Supplemental Table 1. Means of GDF8, GDF11, Follistatin and FSTL3 by race and sex amongst Health ABC and CHS participants.

|                           | Black<br>Men<br>(N=254*) | Black<br>Women<br>(N*=288) | White<br>Men<br>(N*=992) | White<br>Women<br>(N*=1209) | p-value |
|---------------------------|--------------------------|----------------------------|--------------------------|-----------------------------|---------|
| GDF8, ng/mL               | 7.69                     | 6.94                       | 7.27                     | 7.06                        | <.001   |
| GDF11, ng/mL              | 3.30                     | 3.32                       | 3.35                     | 3.35                        | 0.748   |
| Follistatin, pg/mL        | 1849                     | 1692                       | 1674                     | 1990                        | <.001   |
| Follistatin Like-3, pg/mL | 8160                     | 8658                       | 9556                     | 9497                        | <.001   |

\*423 participants are missing follistatin measurements (69 Black men, 81 Black women, 131 White men, 142 White women), and 84 participants are missing FSTL3 measurements (11 Black men, 13 Black women, 25 White men and 35 White women).

Supplemental Table 2. Means of GDF8, GDF11, Follistatin and FSTL3 by Health ABC and CHS participants

|                           | Health ABC<br>(N=1237*) | CHS<br>(N*=1506) | p-value |
|---------------------------|-------------------------|------------------|---------|
| GDF8, ng/mL               | 6.73                    | 7.56             | <.001   |
| GDF11, ng/mL              | 3.28                    | 3.40             | <.001   |
| Follistatin, pg/mL        | 1868                    | 1817             | <.001   |
| Follistatin Like-3, pg/mL | 8745                    | 9748             | <.001   |

\*423 Health ABC participants are missing follistatin measurements, 84 (75 from HABC, 9 from CHS) participants are missing FSTL3 measurements

Supplemental Table 3. Spearman correlations between GDF-11, GDF-8, follistatin and FSTL-3 in Health ABC and CHS

|             | GDF-8                  |                         |                        | Follistatin              |                          |                          | FSTL-3                  |                          |                         |
|-------------|------------------------|-------------------------|------------------------|--------------------------|--------------------------|--------------------------|-------------------------|--------------------------|-------------------------|
|             | All                    | Health<br>ABC           | CHS                    | All                      | Health<br>ABC            | CHS                      | All                     | Health<br>ABC            | CHS                     |
| GDF-11      | 0.15<br><i>p</i> <.001 | 0.07<br><i>p</i> =0.018 | 0.17<br><i>p</i> <.001 | -0.06<br><i>p</i> =0.002 | -0.08<br><i>p</i> =0.017 | -0.05<br><i>p</i> =0.075 | 0.04<br><i>p</i> =0.021 | 0.02<br><i>p</i> =0.548  | 0.03<br><i>p</i> =0.264 |
| GDF-8       |                        |                         |                        | -0.09<br><i>p</i> <.001  | -0.17<br><i>p</i> <.001  | -0.03<br><i>p</i> =0.198 | 0.04<br><i>p</i> =0.021 | -0.03<br><i>p</i> =0.394 | 0.02<br><i>p</i> =0.409 |
| Follistatin |                        |                         |                        |                          |                          |                          | 0.05<br><i>p</i> =0.016 | 0.08<br><i>p</i> =0.021  | 0.07<br><i>p</i> =0.007 |

Supplemental Table 4. Characteristics (mean  $\pm$  SD or N (%)) by quartile of GDF11, CHS

|                                                   | Quartile 1            | Quartile 2              | Quartile 3               | Quartile 4            | p-value |
|---------------------------------------------------|-----------------------|-------------------------|--------------------------|-----------------------|---------|
|                                                   | <3.02 ng/mL           | $\geq$ 3.02-<3.28 ng/mL | $\geq$ 3.28-< 3.60 ng/mL | $\geq$ 3.60 ng/mL     |         |
|                                                   | (N= 374)              | (N= 377)                | (N= 371)                 | (N= 384)              |         |
| Age                                               | 76.74 $\pm$ 4.73      | 76.84 $\pm$ 4.75        | 76.82 $\pm$ 4.81         | 76.98 $\pm$ 4.77      | 0.915   |
| Male                                              | 146 (39.04)           | 147 (38.99)             | 148 (39.89)              | 176 (45.83)           | 0.163   |
| Race                                              |                       |                         |                          |                       | 0.033   |
| White                                             | 366 (97.86)           | 361 (95.76)             | 351 (94.61)              | 364 (94.79)           |         |
| Black                                             | 8 (2.14)              | 15 (3.98)               | 20 (5.39)                | 16 (4.17)             |         |
| Other                                             | 0 (0.0)               | 1 (0.27)                | 0 (0.0)                  | 4 (1.04)              |         |
| Weight, kg                                        | 70.45 $\pm$ 14.19     | 71.81 $\pm$ 14.41       | 70.71 $\pm$ 13.44        | 71.72 $\pm$ 12.86     | 0.41    |
| Height, m                                         | 1.64 $\pm$ 0.09       | 1.64 $\pm$ 0.09         | 1.64 $\pm$ 0.09          | 1.64 $\pm$ 0.09       | 0.843   |
| BMI category                                      |                       |                         |                          |                       | 0.009   |
| Normal Weight                                     | 166 (44.39)           | 127 (33.69)             | 163 (43.94)              | 132 (34.38)           |         |
| Overweight                                        | 147 (39.3)            | 181 (48.01)             | 153 (41.24)              | 187 (48.7)            |         |
| Obese                                             | 61 (16.31)            | 69 (18.3)               | 55 (14.82)               | 65 (16.93)            |         |
| Total body fat, %                                 | 37.04 $\pm$ 9.43      | 36.16 $\pm$ 10.23       | 36.72 $\pm$ 9.44         | 36.1 $\pm$ 10.16      | 0.798   |
| Current smoker                                    | 16 (4.32)             | 32 (8.6)                | 31 (8.42)                | 29 (7.61)             | 0.088   |
| Current drinker                                   | 185 (49.47)           | 194 (51.46)             | 168 (45.28)              | 193 (50.26)           | 0.358   |
| Good/excellent self-rated health                  | 306 (81.82)           | 301 (79.84)             | 292 (78.71)              | 311 (81.2)            | 0.709   |
| Congestive heart failure                          | 22 (5.88)             | 17 (4.51)               | 23 (6.2)                 | 31 (8.07)             | 0.236   |
| Cancer                                            | 64 (17.11)            | 70 (18.57)              | 81 (21.83)               | 78 (20.31)            | 0.389   |
| Chronic obstructive pulmonary disease/bronchitis* | 24 (6.59)             | 18 (4.85)               | 24 (6.61)                | 24 (6.37)             | 0.711   |
| Coronary heart disease                            | 84 (22.46)            | 76 (20.16)              | 84 (22.64)               | 117 (30.47)           | 0.005   |
| GDF-8, ng/mL                                      | 7.20 $\pm$ 1.62       | 7.35 $\pm$ 3.03         | 7.70 $\pm$ 1.89          | 7.98 $\pm$ 1.97       | <.001   |
| Follistatin, pg/mL                                | 1918.25 $\pm$ 1087.53 | 1824.09 $\pm$ 1051.16   | 1829.43 $\pm$ 1034.71    | 1699.47 $\pm$ 820.44  | 0.028   |
| Follistatin-Like-3, pg/mL                         | 9748.9 $\pm$ 2969.55  | 9704.53 $\pm$ 3075.75   | 9755.67 $\pm$ 2660.51    | 9781.42 $\pm$ 2718.73 | 0.987   |
| Angina                                            | 79 (21.1)             | 69 (18.3)               | 78 (21.0)                | 104 (27.1)            | 0.027   |
| Grip strength, kg                                 | 29.49 $\pm$ 9.88      | 29.63 $\pm$ 9.99        | 30.13 $\pm$ 10.36        | 31.02 $\pm$ 10.12     | 0.146   |
| 6m walk speed, m/s                                | 0.93 $\pm$ 0.24       | 0.9 $\pm$ 0.24          | 0.9 $\pm$ 0.23           | 0.92 $\pm$ 0.26       | 0.274   |
| Appendicular lean mass/ht <sup>2</sup>            | 6.28 $\pm$ 1.34       | 6.54 $\pm$ 1.36         | 6.47 $\pm$ 1.29          | 6.74 $\pm$ 1.3        | 0.021   |

Supplemental Table 5. Characteristics of participants by quartile of GDF8, Health ABC

|                                                   | Quartile 1      | Quartile 2        | Quartile 3         | Quartile 4      | p-value |
|---------------------------------------------------|-----------------|-------------------|--------------------|-----------------|---------|
|                                                   | <5.39 ng/mL     | ≥5.39-<6.46 ng/mL | ≥6.46-< 7.80 ng/mL | ≥7.80 ng/mL     |         |
|                                                   | N= 308          | N= 307            | N= 313             | N= 309          |         |
| Age                                               | 73.4 ± 3.0      | 73.6 ± 2.8        | 73.4 ± 2.8         | 73.3 ± 2.9      | 0.606   |
| Male                                              | 121 (39.3)      | 161 (52.4)        | 164 (52.4)         | 183 (59.2)      | <.001   |
| Race                                              |                 |                   |                    |                 | <.001   |
| White                                             | 223 (72.4)      | 199 (64.8)        | 186 (59.4)         | 151 (48.9)      |         |
| Black                                             | 85 (27.6)       | 108 (35.2)        | 127 (40.6)         | 158 (51.1)      |         |
| Weight, kg                                        | 73.0 ± 15.6     | 75.2 ± 14.2       | 76.6 ± 15.4        | 78.1 ± 14.5     | <.001   |
| Height, m                                         | 1.65 ± 0.09     | 1.67 ± 0.09       | 1.67 ± 0.09        | 1.67 ± 0.09     | 0.002   |
| BMI category                                      |                 |                   |                    |                 | 0.008   |
| Normal Weight                                     | 119 (38.6)      | 100 (32.6)        | 103 (32.9)         | 80 (25.9)       |         |
| Overweight                                        | 125 (40.6)      | 145 (47.2)        | 128 (40.9)         | 138 (44.7)      |         |
| Obese                                             | 64 (20.8)       | 62 (20.2)         | 82 (26.2)          | 91 (29.4)       |         |
| Total body fat, %                                 | 36.2 ± 7.3      | 34.4 ± 7.4        | 34.3 ± 7.7         | 33.5 ± 7.5      | <.001   |
| Persistent Severe Mobility Limitation             | 147 (47.7)      | 121 (39.4)        | 117 (37.4)         | 125 (40.5)      | 0.051   |
| Persistent Mobility Limitation                    | 246 (79.9)      | 230 (74.9)        | 241 (77.0)         | 241 (78.0)      | 0.523   |
| Current smoker                                    | 39 (12.7)       | 27 (8.8)          | 22 (7.0)           | 35 (11.3)       | 0.083   |
| Current drinker                                   | 177 (57.5)      | 152 (49.8)        | 161 (51.6)         | 150 (48.9)      | 0.139   |
| Good/excellent health                             | 259 (84.4)      | 263 (85.7)        | 275 (87.9)         | 263 (85.1)      | 0.631   |
| Congestive heart failure                          | 8 (2.6)         | 8 (2.6)           | 8 (2.6)            | 7 (2.3)         | 0.992   |
| Cancer                                            | 73 (23.7)       | 64 (20.8)         | 67 (21.4)          | 51 (16.5)       | 0.164   |
| Chronic obstructive pulmonary disease/bronchitis* | 2 (0.6)         | 3 (1.0)           | 4 (1.3)            | 3 (1.0)         | 0.888   |
| Coronary heart disease                            | 68 (22.1)       | 58 (19.0)         | 63 (20.1)          | 55 (17.8)       | 0.579   |
| GDF-11, ng/mL                                     | 3.27 ± 1.09     | 3.29 ± 0.92       | 3.24 ± 0.39        | 3.32 ± 0.65     | 0.634   |
| Follistatin, pg/mL                                | 2061.9 ± 1017.9 | 1900.2 ± 716.9    | 1870.4 ± 1030.6    | 1679.7 ± 638.9  | <.001   |
| Follistatin-Like-3, pg/mL                         | 8793.0 ± 2333.3 | 8754.8 ± 2384.1   | 8716.3 ± 2307.0    | 8715.2 ± 2326.5 | 0.974   |
| Angina                                            | 39 (12.9)       | 30 (9.9)          | 28 (9.2)           | 26 (8.7)        | 0.323   |
| Grip strength, kg                                 | 30.84 ± 10.28   | 33.96 ± 10.84     | 33.66 ± 10.51      | 34.75 ± 10.84   | <.001   |
| 6m walk speed, m/s                                | 1.17 ± 0.22     | 1.2 ± 0.22        | 1.2 ± 0.23         | 1.19 ± 0.24     | 0.275   |
| Appendicular lean mass/ht <sup>2</sup>            | 7.17 ± 1.35     | 7.62 ± 1.3        | 7.75 ± 1.35        | 8.09 ± 1.41     | <.001   |

Supplemental Table 6. Characteristics of participants by quartile of GDF8, CHS

|                                                   | Quartile 1      | Quartile 2        | Quartile 3         | Quartile 4      | p-value |
|---------------------------------------------------|-----------------|-------------------|--------------------|-----------------|---------|
|                                                   | <6.10 ng/mL     | ≥6.10-<7.17 ng/mL | ≥7.17-< 8.54 ng/mL | ≥8.54 ng/mL     |         |
|                                                   | N= 376          | N= 373            | N= 377             | N= 380          |         |
| Age                                               | 77.0 ± 4.9      | 76.7 ± 4.7        | 77.0 ± 4.7         | 76.6 ± 4.7      | 0.628   |
| Male                                              | 140 (37.2)      | 143 (38.3)        | 167 (44.3)         | 167 (43.9)      | 0.096   |
| Race                                              |                 |                   |                    |                 | 0.639   |
| White                                             | 366 (97.3)      | 355 (95.2)        | 361 (95.8)         | 360 (94.7)      |         |
| Black                                             | 9 (2.4)         | 16 (4.3)          | 15 (4.0)           | 19 (5.0)        |         |
| Other                                             | 1 (0.3)         | 2 (0.5)           | 1 (0.3)            | 1 (0.3)         |         |
| Weight, kg                                        | 69.6 ± 12.7     | 71.0 ± 13.4       | 71.9 ± 14.7        | 72.2 ± 13.9     | 0.036   |
| Height, m                                         | 1.63 ± 0.09     | 1.64 ± 0.09       | 1.65 ± 0.09        | 1.65 ± 0.1      | 0.044   |
| BMI category                                      |                 |                   |                    |                 | 0.528   |
| Normal Weight                                     | 145 (38.6)      | 138 (37.0)        | 155 (41.1)         | 150 (39.5)      |         |
| Overweight                                        | 179 (47.6)      | 170 (45.6)        | 157 (41.6)         | 162 (42.6)      |         |
| Obese                                             | 52 (13.8)       | 65 (17.4)         | 65 (17.2)          | 68 (17.9)       |         |
| Total body fat, %                                 | 36.8 ± 10.4     | 36.6 ± 9.8        | 36.2 ± 9.0         | 36.3 ± 10.0     | 0.931   |
| Current smoker                                    | 26 (7.0)        | 33 (9.0)          | 25 (6.7)           | 24 (6.4)        | 0.509   |
| Current drinker                                   | 192 (51.1)      | 180 (48.3)        | 181 (48.0)         | 187 (49.2)      | 0.834   |
| Good/excellent health                             | 311 (82.9)      | 302 (81.0)        | 288 (76.4)         | 309 (81.3)      | 0.130   |
| Congestive heart failure                          | 20 (5.3)        | 27 (7.2)          | 24 (6.4)           | 22 (5.8)        | 0.723   |
| Cancer                                            | 61 (16.2)       | 84 (22.5)         | 70 (18.6)          | 78 (20.5)       | 0.157   |
| Chronic obstructive pulmonary disease/bronchitis* | 20 (5.4)        | 33 (9.1)          | 20 (5.5)           | 17 (4.5)        | 0.049   |
| Coronary heart disease                            | 94 (25.0)       | 90 (24.1)         | 90 (23.9)          | 87 (23.0)       | 0.926   |
| GDF11, ng/mL                                      | 3.24 ± 0.55     | 3.45 ± 0.97       | 3.37 ± 0.88        | 3.51 ± 0.85     | <.001   |
| Follistatin, pg/mL                                | 1900.2 ± 1157.4 | 1812.6 ± 952.5    | 1830.1 ± 1055.9    | 1726.0 ± 820.1  | 0.124   |
| Follistatin-Like-3, pg/mL                         | 9577.3 ± 2801.4 | 9835.8 ± 2965.0   | 9956.1 ± 2914.0    | 9624.3 ± 2746.3 | 0.223   |
| Angina                                            | 88 (23.4)       | 80 (21.5)         | 86 (22.8)          | 76 (20.0)       | 0.676   |
| Grip strength, kg                                 | 28.93 ± 9.56    | 29.6 ± 9.99       | 29.88 ± 9.75       | 31.86 ± 10.84   | <.001   |
| 6m walk speed, m/s                                | 0.89 ± 0.24     | 0.91 ± 0.25       | 0.92 ± 0.25        | 0.92 ± 0.24     | 0.329   |
| Appendicular lean mass/ht <sup>2</sup>            | 6.41 ± 1.35     | 6.41 ± 1.26       | 6.48 ± 1.3         | 6.74 ± 1.37     | 0.071   |

Supplemental Table 7. Characteristics of participants by quartile of follistatin, Health ABC

|                                                   | Quartile 1      | Quartile 2            | Quartile 3             | Quartile 4    | p-value |
|---------------------------------------------------|-----------------|-----------------------|------------------------|---------------|---------|
|                                                   | <1343.8 pg/mL   | ≥1343.8-<1705.6 pg/mL | ≥1705.6 -<2188.3 pg/mL | ≥2188.3 pg/mL |         |
|                                                   | N= 206          | N= 204                | N= 203                 | N= 201        |         |
| Age                                               | 73.0 ± 2.8      | 73.7 ± 2.8            | 73.6 ± 2.9             | 73.6 ± 2.9    | 0.039   |
| Male                                              | 114 (55.3)      | 116 (56.9)            | 107 (52.7)             | 92 (45.8)     | 0.118   |
| Race                                              |                 |                       |                        |               | 0.113   |
| White                                             | 115 (55.8)      | 123 (60.3)            | 115 (56.7)             | 133 (66.2)    |         |
| Black                                             | 91 (44.2)       | 81 (39.7)             | 88 (43.4)              | 68 (33.8)     |         |
| Other                                             |                 |                       |                        |               |         |
| Weight, kg                                        | 75.6 ± 13.6     | 77.3 ± 15.0           | 77.3 ± 14.4            | 74.2 ± 14.6   | 0.078   |
| Height, m                                         | 1.68 ± 0.1      | 1.68 ± 0.09           | 1.67 ± 0.09            | 1.66 ± 0.09   | 0.082   |
| BMI category                                      |                 |                       |                        |               | 0.340   |
| Normal Weight                                     | 71 (34.5)       | 59 (28.9)             | 56 (27.6)              | 68 (33.8)     |         |
| Overweight                                        | 89 (43.2)       | 88 (43.1)             | 87 (42.9)              | 91 (45.3)     |         |
| Obese                                             | 46 (22.3)       | 57 (27.9)             | 60 (29.6)              | 42 (20.9)     |         |
| Total body fat, %                                 | 33.4 ± 7.6      | 34.1 ± 7.5            | 34.8 ± 7.3             | 35.1 ± 7.5    | 0.099   |
| Persistent Severe Mobility Limitation             | 72 (35.0)       | 89 (43.6)             | 87 (42.9)              | 81 (40.3)     | 0.269   |
| Persistent Mobility Limitation                    | 152 (73.8)      | 161 (78.9)            | 163 (80.3)             | 164 (81.6)    | 0.234   |
| Current smoker                                    | 17 (8.3)        | 18 (8.9)              | 19 (9.4)               | 25 (12.4)     | 0.494   |
| Current drinker                                   | 104 (50.5)      | 106 (52.5)            | 105 (52.0)             | 100 (50.0)    | 0.953   |
| Good/excellent health                             | 177 (85.9)      | 179 (87.7)            | 175 (86.2)             | 164 (81.6)    | 0.336   |
| Congestive heart failure                          | 5 (2.5)         | 8 (3.9)               | 5 (2.5)                | 5 (2.5)       | 0.769   |
| Cancer,                                           | 51 (24.8)       | 50 (24.5)             | 25 (12.3)              | 38 (18.9)     | 0.005   |
| Chronic obstructive pulmonary disease/bronchitis* | 5 (2.4)         | 1 (0.5)               | 2 (1.0)                | 3 (1.5)       | 0.368   |
| Coronary heart disease                            | 39 (18.9)       | 37 (18.1)             | 49 (24.1)              | 42 (20.9)     | 0.444   |
| GDF8, ng/mL                                       | 7.29 ± 2.11     | 6.96 ± 1.80           | 6.85 ± 1.85            | 6.57 ± 2.27   | 0.004   |
| GDF11, ng/mL                                      | 3.33 ± 0.57     | 3.34 ± 0.83           | 3.34 ± 0.68            | 3.25 ± 0.54   | 0.447   |
| Follistatin-Like-3, pg/mL                         | 8584.6 ± 2366.7 | 8497.3 ± 2018.1       | 8587.1 ± 1991.9        | 9094.9 ± 2712 | 0.037   |
| Angina                                            | 19 (9.4)        | 22 (10.8)             | 25 (12.7)              | 23 (11.7)     | 0.761   |
| Grip strength, kg                                 | 35.12 ± 11.49   | 35.58 ± 10.5          | 33.58 ± 10.01          | 31.71 ± 10.55 | 0.001   |
| 6m walk speed, m/s                                | 1.22 ± 0.22     | 1.19 ± 0.22           | 1.19 ± 0.24            | 1.18 ± 0.24   | 0.438   |
| Appendicular lean mass/ht <sup>2</sup>            | 7.79 ± 1.3      | 7.81 ± 1.36           | 7.86 ± 1.36            | 7.52 ± 1.47   | 0.073   |



Supplemental Table 8. Characteristics of participants by quartile of follistatin, CHS

|                                                   | Quartile 1      | Quartile 2                 | Quartile 3                | Quartile 4      | p-value      |
|---------------------------------------------------|-----------------|----------------------------|---------------------------|-----------------|--------------|
|                                                   | <1215.5 pg/mL   | ≥1215.5 -<br><1558.9 pg/mL | ≥1558.9-< 2070.9<br>pg/mL | ≥2070.9 pg/mL   |              |
|                                                   | N= 376          | N= 377                     | N= 376                    | N= 377          |              |
| Age                                               | 76.5 ± 4.4      | 76.9 ± 4.7                 | 77.2 ± 5.1                | 76.8 ± 4.8      | 0.175        |
| Male                                              | 172 (45.7)      | 181 (48.0)                 | 154 (41.0)                | 110 (29.2)      | <.001        |
| Race                                              |                 |                            |                           |                 | 0.626        |
| White                                             | 355 (94.4)      | 360 (95.5)                 | 360 (95.7)                | 367 (97.3)      |              |
| Black                                             | 19 (5.1)        | 16 (4.2)                   | 15 (4.0)                  | 9 (2.4)         |              |
| Other                                             | 2 (0.5)         | 1 (0.3)                    | 1 (0.3)                   | 1 (0.3)         |              |
| Weight, kg                                        | 71.6 ± 13.6     | 72.7 ± 14.1                | 71.1 ± 14.0               | 69.2 ± 13.1     | 0.004        |
| Height, m                                         | 1.65 ± 0.09     | 1.65 ± 0.10                | 1.64 ± 0.09               | 1.62 ± 0.09     | <.001        |
| BMI category                                      |                 |                            |                           |                 | 0.492        |
| Normal Weight                                     | 147 (39.1)      | 133 (35.3)                 | 147 (39.1)                | 161 (42.7)      |              |
| Overweight                                        | 165 (43.9)      | 182 (48.3)                 | 162 (43.1)                | 159 (42.2)      |              |
| Obese                                             | 64 (17.0)       | 62 (16.4)                  | 67 (17.8)                 | 57 (15.1)       |              |
| Total body fat, %                                 | 35.1 ± 9.4      | 34.7 ± 10.1                | 37.1 ± 10.2               | 39.5 ± 8.7      | <.001        |
| Current smoker                                    | 32 (8.6)        | 20 (5.3)                   | 30 (8.1)                  | 26 (7.0)        | 0.321        |
| Current drinker                                   | 179 (47.6)      | 184 (48.8)                 | 190 (50.5)                | 187 (49.6)      | 0.875        |
| Good/excellent health                             | 295 (78.5)      | 311 (82.5)                 | 288 (76.8)                | 316 (83.8)      | 0.050        |
| Congestive heart failure                          | 18 (4.8)        | 24 (6.4)                   | 29 (7.7)                  | 22 (5.8)        | 0.410        |
| Cancer                                            | 79 (21.0)       | 75 (19.9)                  | 62 (16.5)                 | 77 (20.4)       | 0.397        |
| Chronic obstructive pulmonary disease/bronchitis* | 21 (5.7)        | 18 (4.9)                   | 19 (5.2)                  | 32 (8.6)        | 0.124        |
| Coronary heart disease                            | 107 (28.5)      | 84 (22.3)                  | 101 (26.9)                | 69 (18.3)       | 0.004        |
| GDF8, ng/mL                                       | 7.60 ± 1.93     | 7.67 ± 3.04                | 7.55 ± 1.86               | 7.42 ± 1.80     | 0.464        |
| GDF11, ng/mL                                      | 3.43 ± 0.93     | 3.35 ± 0.51                | 3.41 ± 0.70               | 3.39 ± 1.08     | 0.651        |
| Follistatin-Like-3, pg/mL                         | 9402.4 ± 2813.6 | 9729.5 ± 2734.3            | 10025.0 ± 2831.0          | 9836.9 ± 3024.9 | 0.025        |
| Angina                                            | 98 (26.1)       | 76 (20.2)                  | 93 (24.7)                 | 63 (16.7)       | <b>0.007</b> |
| Grip strength, kg                                 | 31.2 ± 10.35    | 31.87 ± 10.84              | 29.05 ± 9.59              | 28.17 ± 9.1     | <.001        |
| 6m walk speed, m/s                                | 0.92 ± 0.23     | 0.92 ± 0.24                | 0.89 ± 0.26               | 0.92 ± 0.24     | 0.331        |
| Appendicular lean mass/ht <sup>2</sup>            | 6.66 ± 1.27     | 6.76 ± 1.33                | 6.59 ± 1.34               | 5.98 ± 1.24     | <.001        |

Supplemental Table 9. Characteristics of participants by quartile of FSTL3, Health ABC

|                                                   | Quartile 1     | Quartile 2               | Quartile 3                | Quartile 4     | p-value |
|---------------------------------------------------|----------------|--------------------------|---------------------------|----------------|---------|
|                                                   | <7242.3pg/mL   | ≥7242.3-<8391.8<br>pg/mL | ≥8391.8-<<br>9758.1 pg/mL | ≥9758.1 pg/mL  |         |
|                                                   | N= 292         | N= 287                   | N= 290                    | N= 293         |         |
| Age                                               | 72.8 ± 2.7     | 73.2 ± 2.9               | 73.7 ± 2.8                | 73.9 ± 3.0     | <.001   |
| Male                                              | 160 (54.8)     | 156 (54.4)               | 143 (49.3)                | 137 (46.8)     | 0.146   |
| Race                                              |                |                          |                           |                | <.001   |
| White                                             | 120 (41.1)     | 184 (64.1)               | 198 (68.3)                | 205 (70.0)     |         |
| Black                                             | 172 (58.9)     | 103 (35.9)               | 92 (31.7)                 | 88 (30.0)      |         |
| Other                                             |                |                          |                           |                |         |
| Weight, kg                                        | 73.0 ± 15.0    | 75.3 ± 14.8              | 78.4 ± 15.1               | 76.8 ± 14.6    | <.001   |
| Height, m                                         | 1.67 ± 0.09    | 1.68 ± 0.09              | 1.67 ± 0.09               | 1.66 ± 0.09    | 0.111   |
| BMI category                                      |                |                          |                           |                | <.001   |
| Normal Weight                                     | 124 (42.5)     | 98 (34.1)                | 76 (26.2)                 | 79 (27.0)      |         |
| Overweight                                        | 115 (39.4)     | 128 (44.6)               | 124 (42.8)                | 132 (45.1)     |         |
| Obese                                             | 53 (18.2)      | 61 (21.3)                | 90 (31.0)                 | 82 (28.0)      |         |
| Total body fat, %                                 | 32.5 ± 7.3     | 33.6 ± 7.4               | 36.0 ± 7.2                | 36.3 ± 7.8     | <.001   |
| Persistent Severe Mobility Limitation             | 89 (30.5)      | 105 (36.6)               | 125 (43.1)                | 153 (52.2)     | <.001   |
| Persistent Mobility Limitation                    | 204 (69.9)     | 212 (73.9)               | 233 (80.3)                | 244 (83.3)     | <.001   |
| Current smoker                                    | 44 (15.1)      | 26 (9.1)                 | 15 (5.2)                  | 32 (10.9)      | 0.001   |
| Current drinker                                   | 158 (54.5)     | 155 (54.2)               | 150 (51.7)                | 145 (49.8)     | 0.639   |
| Good/excellent health                             | 253 (86.6)     | 243 (84.7)               | 248 (85.5)                | 253 (86.6)     | 0.883   |
| Congestive heart failure                          | 5 (1.7)        | 5 (1.8)                  | 7 (2.5)                   | 12 (4.2)       | 0.204   |
| Cancer                                            | 51 (17.5)      | 60 (20.9)                | 57 (19.7)                 | 69 (23.5)      | 0.323   |
| Chronic obstructive pulmonary disease/bronchitis* | 4 (1.4)        | 2 (0.7)                  | 2 (0.7)                   | 4 (1.4)        | 0.731   |
| Coronary heart disease                            | 39 (13.4)      | 61 (21.3)                | 61 (21.0)                 | 68 (23.2)      | 0.015   |
| GDF8, ng/mL                                       | 6.77 ± 1.78    | 6.76 ± 2.01              | 6.71 ± 2.06               | 6.69 ± 2.02    | 0.963   |
| GDF11, ng/mL                                      | 3.21 ± 0.35    | 3.30 ± 0.80              | 3.29 ± 0.58               | 3.37 ± 1.28    | 0.167   |
| Follistatin, pg/mL                                | 1771.0 ± 713.3 | 1741.0 ± 607.1           | 2031.4 ± 1174.9           | 1919.4 ± 863.6 | 0.002   |
| Angina                                            | 19 (6.6)       | 31 (11.1)                | 29 (10.3)                 | 39 (13.4)      | 0.061   |
| Grip strength, kg                                 | 34.92 ± 10.47  | 34.24 ± 10.81            | 32.79 ± 10.8              | 31.87 ± 10.52  | 0.002   |
| 6m walk speed, m/s                                | 1.21 ± 0.23    | 1.21 ± 0.24              | 1.19 ± 0.23               | 1.16 ± 0.22    | 0.038   |
| Appendicular lean mass/ht <sup>2</sup>            | 7.79 ± 1.45    | 7.67 ± 1.42              | 7.73 ± 1.37               | 7.55 ± 1.31    | 0.229   |

Supplemental Table 10. Characteristics of participants by quartile of FSTL3, CHS

|                                                   | Quartile 1     | Quartile 2                | Quartile 3               | Quartile 4      | p-value |
|---------------------------------------------------|----------------|---------------------------|--------------------------|-----------------|---------|
|                                                   | <7830.3 pg/mL  | ≥7830.3-<br><9199.4 pg/mL | ≥9199.4-<br>10925.1pg/mL | ≥10925.1pg/mL   |         |
|                                                   | N= 374         | N= 374                    | N= 374                   | N= 375          |         |
| Age                                               | 74.9 ± 3.6     | 76.1 ± 4.1                | 77.5 ± 4.9               | 78.8 ± 5.4      | <.001   |
| Male                                              | 138 (36.9)     | 154 (41.2)                | 159 (42.5)               | 163 (43.5)      | 0.272   |
| Race                                              |                |                           |                          |                 | 0.075   |
| White                                             | 349 (93.3)     | 364 (97.3)                | 362 (96.8)               | 359 (95.7)      |         |
| Black                                             | 23 (6.2)       | 8 (2.1)                   | 11 (2.9)                 | 16 (4.3)        |         |
| Other                                             | 2 (0.5)        | 2 (0.5)                   | 1 (0.3)                  | 0 (0.0)         |         |
| Weight, kg                                        | 68.0 ± 12.7    | 71.0 ± 13.4               | 72.1 ± 14.0              | 73.8 ± 14.3     | <.001   |
| Height, m                                         | 1.64 ± 0.09    | 1.64 ± 0.09               | 1.65 ± 0.10              | 1.64 ± 0.09     | 0.766   |
| BMI category                                      |                |                           |                          |                 | <.001   |
| Normal Weight                                     | 189 (50.5)     | 146 (39.0)                | 133 (35.6)               | 114 (30.4)      |         |
| Overweight                                        | 147 (39.3)     | 175 (46.8)                | 176 (47.1)               | 167 (44.5)      |         |
| Obese                                             | 38 (10.2)      | 53 (14.2)                 | 65 (17.4)                | 94 (25.1)       |         |
| Total body fat, %                                 | 34.9 ± 10.0    | 36.6 ± 9.5                | 36.7 ± 9.6               | 38.0 ± 10.0     | 0.033   |
| Current smoker                                    | 39 (10.5)      | 19 (5.1)                  | 23 (6.2)                 | 26 (7.1)        | 0.027   |
| Current drinker                                   | 187 (50.0)     | 189 (50.5)                | 192 (51.3)               | 171 (45.6)      | 0.396   |
| Good/excellent health                             | 318 (85.0)     | 318 (85.0)                | 308 (82.6)               | 264 (70.4)      | <.001   |
| Congestive heart failure                          | 8 (2.1)        | 15 (4.0)                  | 25 (6.7)                 | 42 (11.2)       | <.001   |
| Cancer                                            | 53 (14.2)      | 65 (17.4)                 | 75 (20.1)                | 100 (26.7)      | <.001   |
| Chronic obstructive pulmonary disease/bronchitis* | 21 (5.8)       | 19 (5.2)                  | 22 (6.0)                 | 27 (7.3)        | 0.666   |
| Coronary heart disease                            | 73 (19.5)      | 69 (18.5)                 | 105 (28.1)               | 113 (30.1)      | <.001   |
| GDF8, ng/mL                                       | 7.59 ± 2.75    | 7.59 ± 2.33               | 7.46 ± 1.89              | 7.58 ± 1.78     | 0.802   |
| GDF11, ng/mL                                      | 3.34 ± 0.65    | 3.42 ± 0.93               | 3.39 ± 0.65              | 3.44 ± 1.03     | 0.410   |
| Follistatin, pg/mL                                | 1777.4 ± 965.7 | 1739.2 ± 915.3            | 1862.3 ± 1054.2          | 1878.7 ± 1075.6 | 0.173   |
| Angina                                            | 68 (18.2)      | 62 (16.6)                 | 95 (25.4)                | 104 (27.7)      | <.001   |
| Grip strength, kg                                 | 30.45 ± 10.07  | 30.68 ± 10.3              | 30.34 ± 9.79             | 29.01 ± 10.18   | 0.101   |
| 6m walk speed, m/s                                | 0.97 ± 0.24    | 0.94 ± 0.23               | 0.91 ± 0.24              | 0.83 ± 0.24     | <.001   |
| Appendicular lean mass/ht <sup>2</sup>            | 6.42 ± 1.5     | 6.51 ± 1.31               | 6.59 ± 1.2               | 6.52 ± 1.26     | 0.725   |

Supplemental Figure 1. Age, sex, and race adjusted beta-coefficients for log GDF-8, log GDF-11, log follistatin and log FSTL3 with lean mass, strength, and walking performance in Health ABC

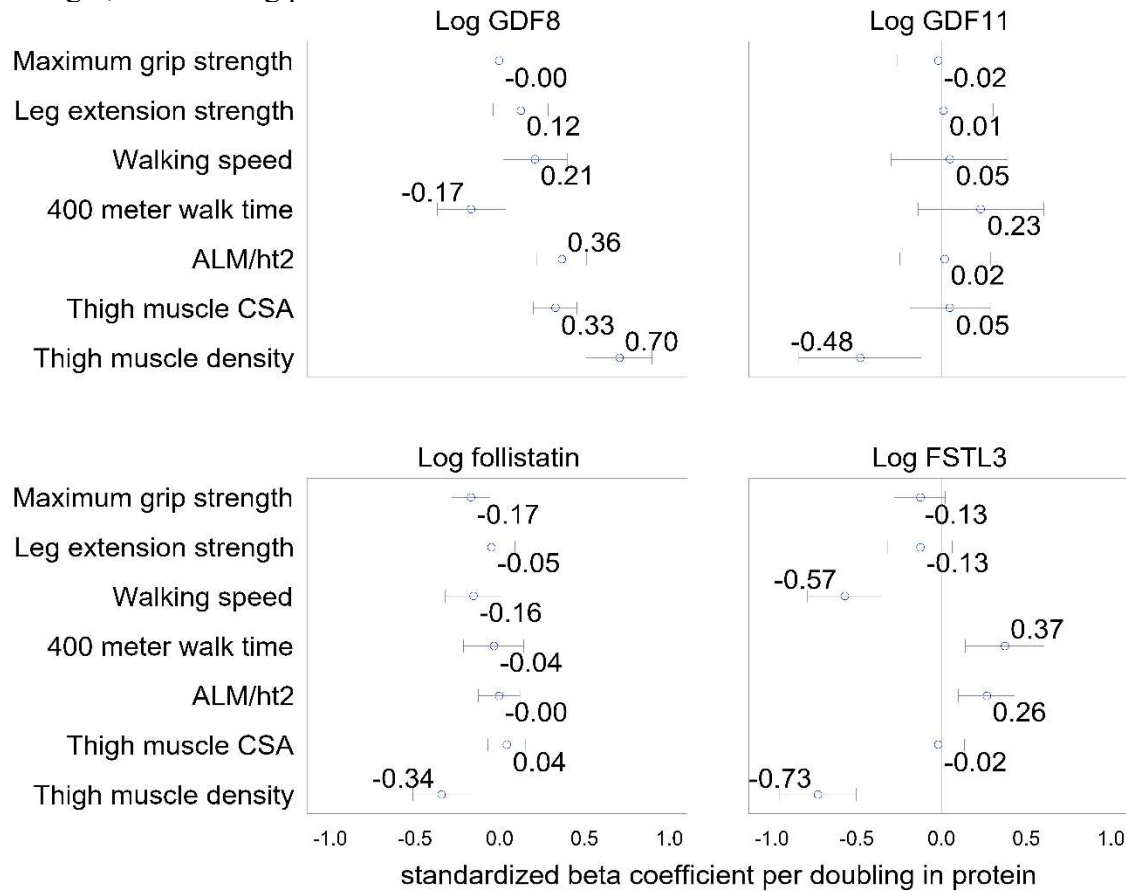

\*Model is adjusted for age, sex, race, self-rated health, body mass index, cancer, chronic obstructive pulmonary disease, angina, smoking status, drinking status, coronary heart disease, heart failure, cystatin c, c-reactive protein and estimated glomerular filtration rate.

GDF: growth and differentiation factor; FSTL3: follistatin-like 3

Supplemental Figure 2. Age, sex, and race adjusted beta-coefficients for log GDF-8, log GDF-11, log follistatin and log FSTL3 with lean mass, strength, and walking performance in CHS

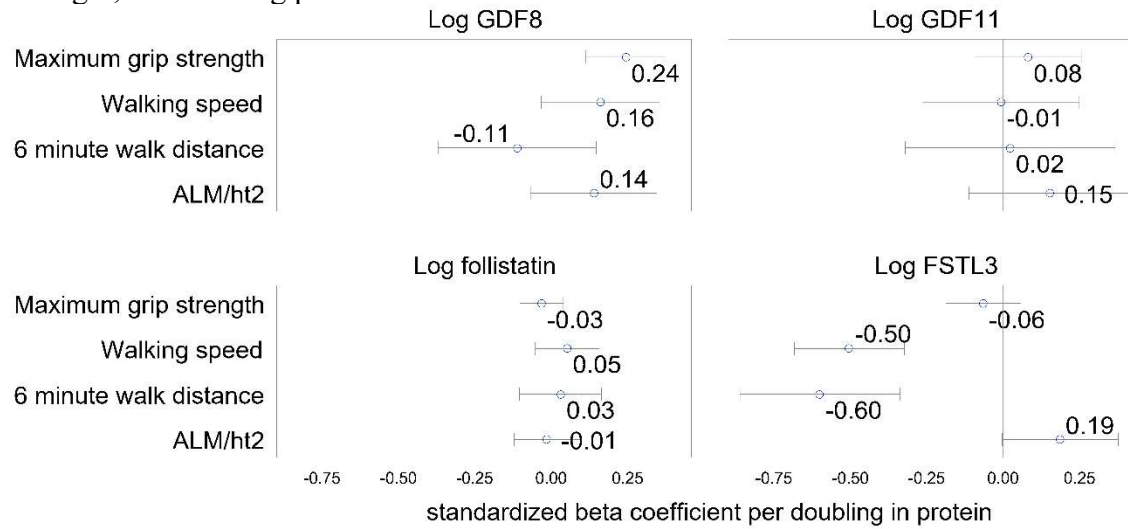

\*Model is adjusted for age, sex, race, self-rated health, body mass index, cancer, chronic obstructive pulmonary disease, angina, smoking status, drinking status, coronary heart disease, heart failure, cystatin c, c-reactive protein and estimated glomerular filtration rate.  
 GDF: growth and differentiation factor; FSTL3: follistatin-like 3
